# Supplementary material for: Smart textiles for human–machine interface fabricated via a facile on-site vapor-phase polymerization
Source: Royal Society of Chemistry journal article supplement (doi:10.1039/d2tc01618d), 2022-01-01
Supplement: d2tc01618d2.pdf [file d2tc01618d2.pdf]

## **Smart Textiles for Human-machine Interface Fabricated *via* Facile on-site Vapor Phase Polymerization**

Haoyu Wang,<sup>‡a</sup> Yi Xing,<sup>‡a</sup> Zuo Xiao,<sup>b</sup> Hengda Sun,<sup>a</sup> Gang Wang<sup>\*a</sup> and Meifang Zhu<sup>a</sup>

<sup>a</sup> State Key Laboratory for Modification of Chemical Fibers and Polymer Materials, College of Materials Science and Engineering, Shanghai Key Laboratory of Lightweight Structural Composites, Key Laboratory of High Performance fibers & products, Ministry of Education, Donghua University, Shanghai 201620, P. R. of China

<sup>b</sup> School of Information Science and Technology, Donghua University (DHU), China

<sup>‡</sup> These authors contributed equally to this work.

## Contents

|                                                                              |          |
|------------------------------------------------------------------------------|----------|
| <b>Ultra depth microscopy and stylus profiler images of thin films .....</b> | <b>3</b> |
| <b>Raman spectra of PEDOT:Tos film with 0, 6, 12wt.% PEG additions .....</b> | <b>3</b> |
| <b>Ultra depth microscopy images of PEDOT:PSS coated yarns .....</b>         | <b>4</b> |
| <b>EDS images of PEDOT:Tos coated yarns.....</b>                             | <b>4</b> |
| <b>Conduction uniformity test .....</b>                                      | <b>5</b> |
| <b>Circuit diagram of spaced fabric key array .....</b>                      | <b>5</b> |

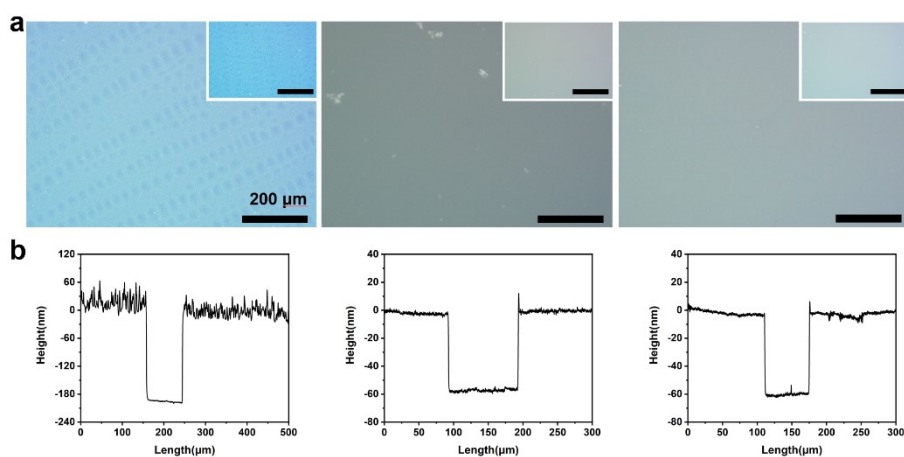

**Fig. S1** (a) From left to right are the optical microscope and (b) Profilometer images of PEDOT thin films with 0, 3, and 6wt.% PEG additions, respectively. The inset is an image taken at 1000x magnification. It could be observed that the addition of PEG was beneficial to the formation of a smooth surface of the film.

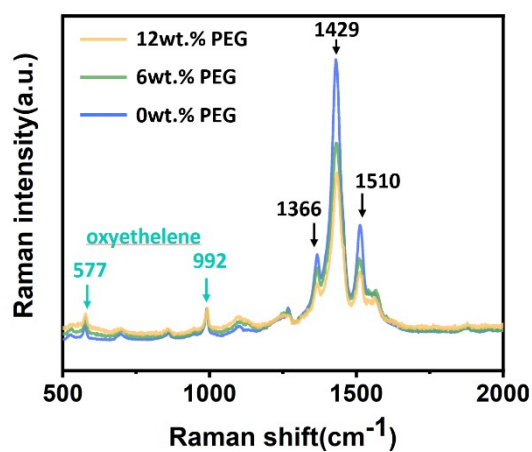

**Fig. S2** Raman spectra of PEDOT:Tos film with 0, 6, 12wt.% PEG additions, where the data were normalized to the peak at 992  $\text{cm}^{-1}$ .

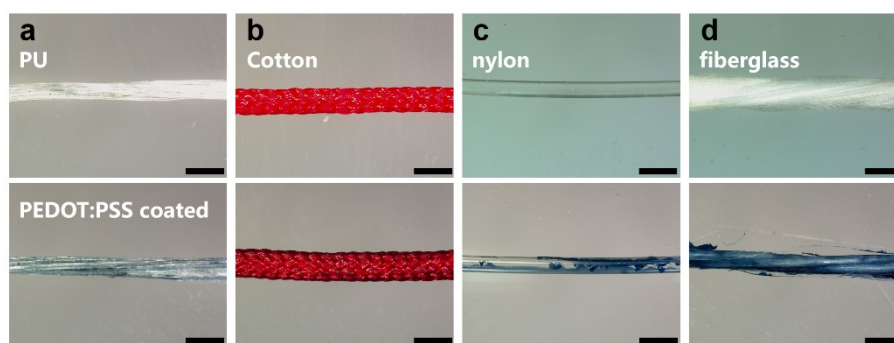

**Fig. S3** Ultra-depth microscopy images of PEDOT:PSS coatings constructed on (a) PU, (b) cotton, (c) nylon, (d) fiberglass surfaces. Among them, from top to bottom are bare yarn, scale bar : 400  $\mu\text{m}$ . All samples showed significant inhomogeneity.

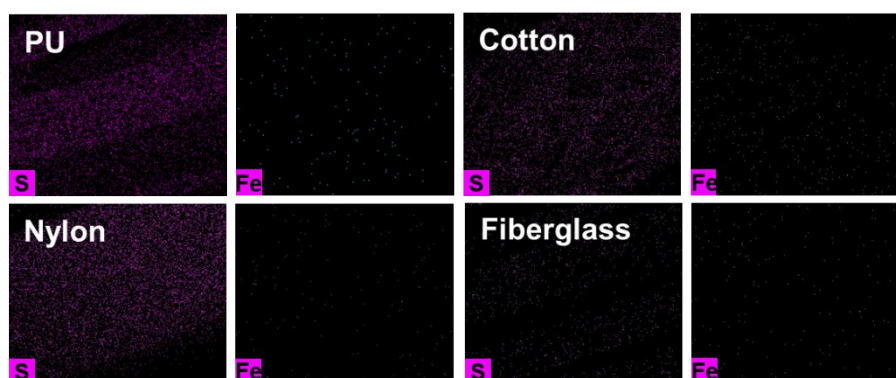

**Fig. S4** EDS images of PEDOT:Tos coated on PU, cotton, nylon and fiberglass yarns.

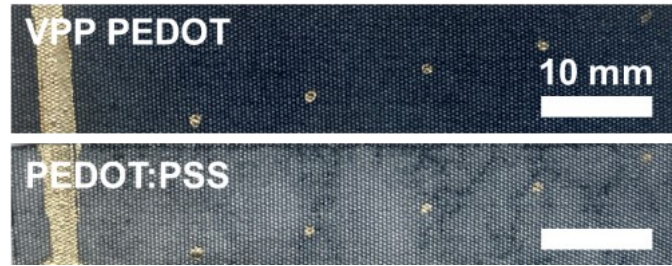

**Fig. S5** Conduction uniformity test, used silver paste to define the origin at one end of the fabric, and then applied the silver paste to the positions 10, 20, 30, 40, 50 mm away from the origin. Ensured that the lines connecting these positions and the origin (parallel to the long side of the fabric) were parallel to each other but not in a straight line.

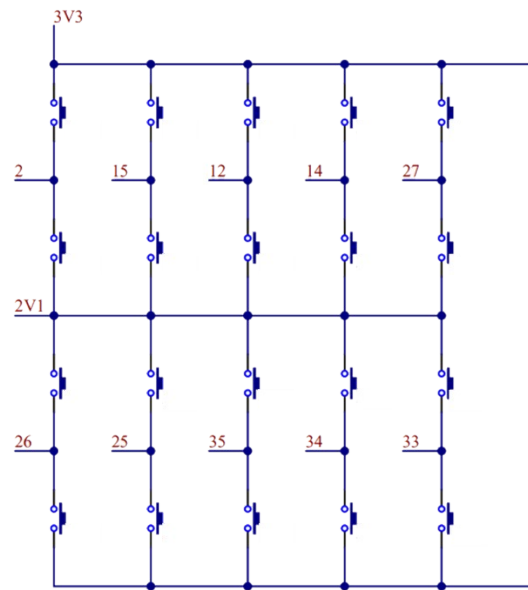

**Fig. S6** Circuit diagram of spaced fabric key array, In the circuit, every two adjacent buttons shared an interface, and the 3.3V power supply was divided into 3.3V and 2.1V through a step-down chip (the model is marked in the experiment), and the two fabric switches were connected respectively. After pressing the fabric, according to the voltage value obtained by the data acquisition circuit board and the corresponding port, distinguished the position of the pressed fabric, and outputted the corresponding programming content.
